# Supplementary material for: Short-range hunters: exploring the function and constraints of water shooting in dwarf gouramis
Source: Oxford University Press journal article supplement (doi:10.1242/jeb.243477), 2021-12-02
Supplement: jeb243477supp.pdf [file jeb243477supp.pdf]

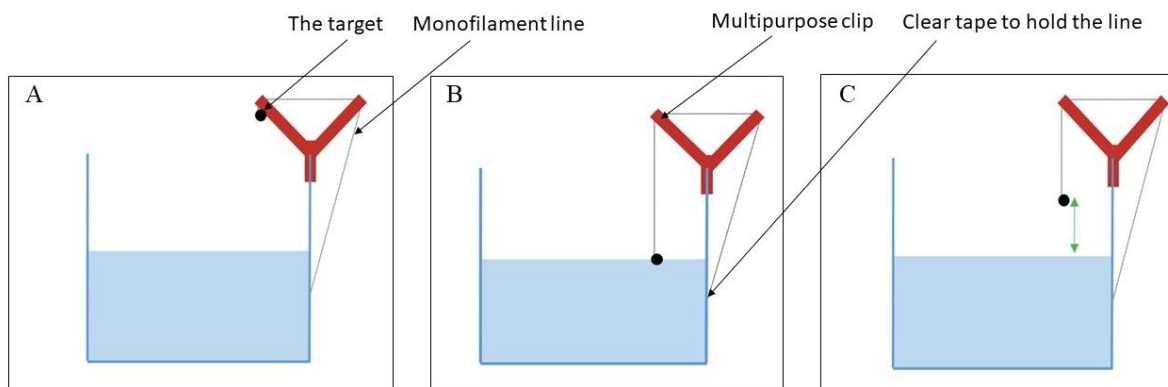

**Fig. S1.** A sketch of the apparatus used in experiment 1 which was used to raise position the target at specific heights above the water surface. A) Represents the starting position, B) the position of the bead during the training phase of the experiment) and C the range of heights used in the testing phase.

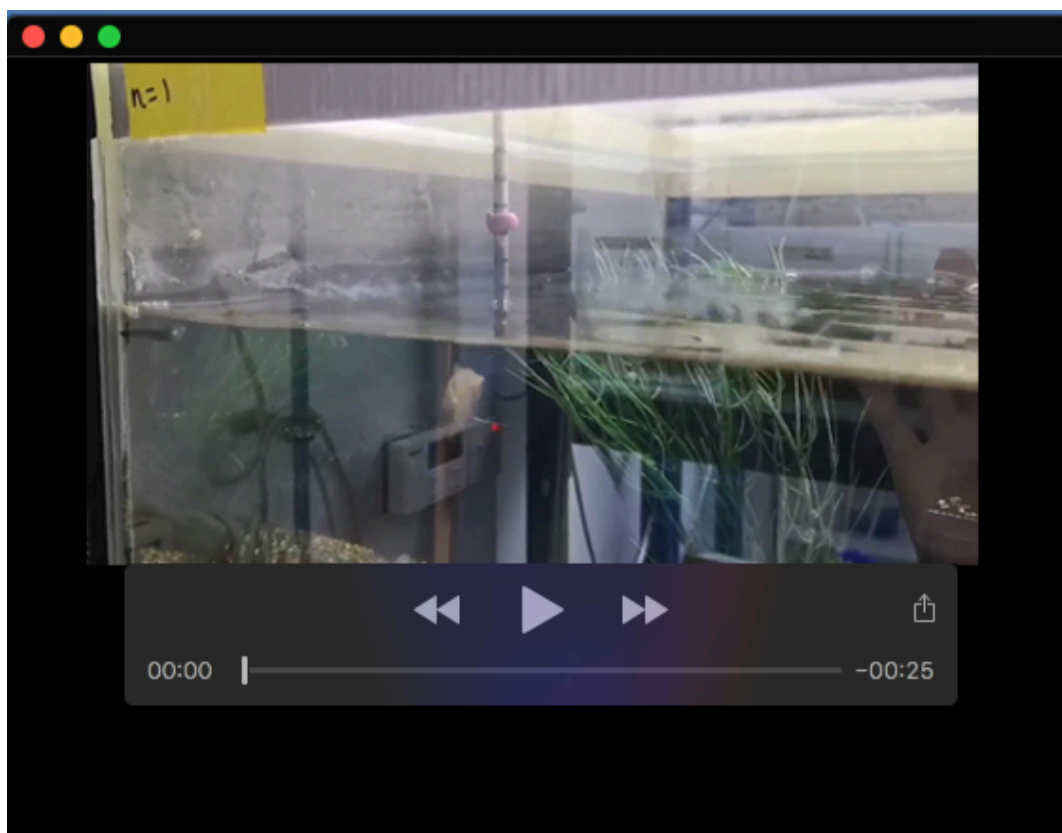

**Movie 1.** Video of a female gourami shooting at a target in a trial during experiment 3.
